# Supplementary material
Source: Springer Nature journal article supplement (https://www.springermedizin.de/resource/supplementary/13006_2011_138_MOESM1_ESM.pdf/9628098)

# Women ≤ 50 years of age

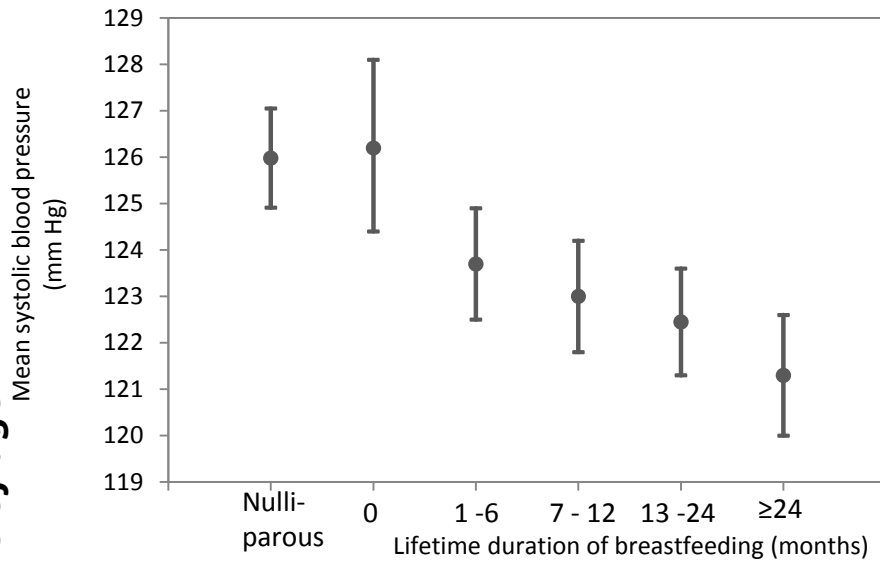

# Women > 50 years of age

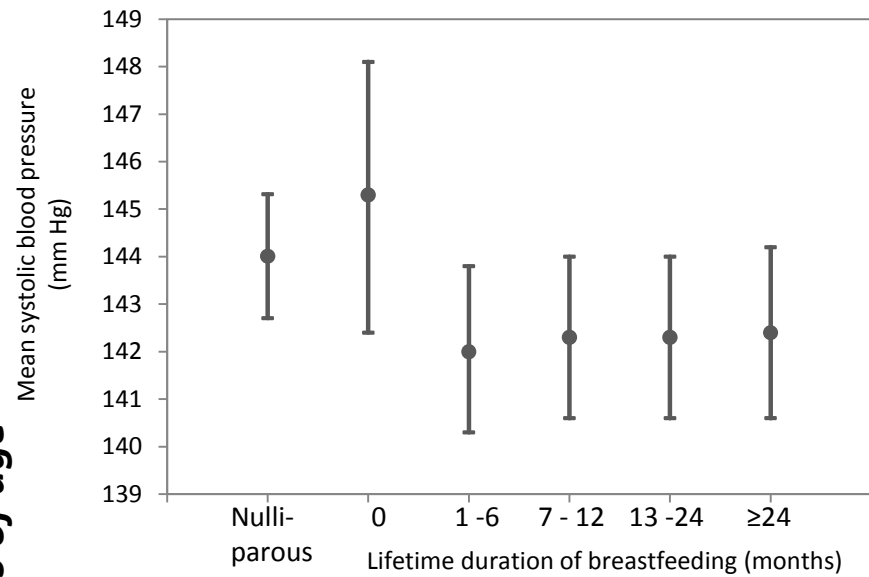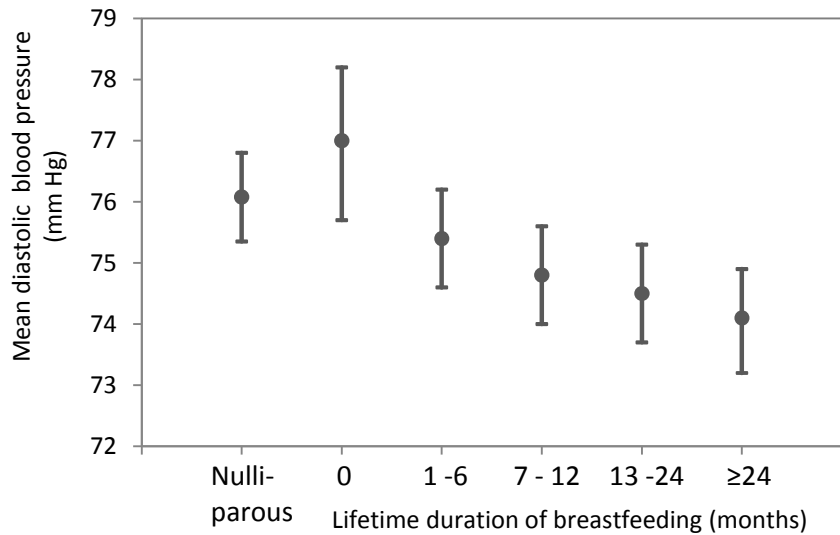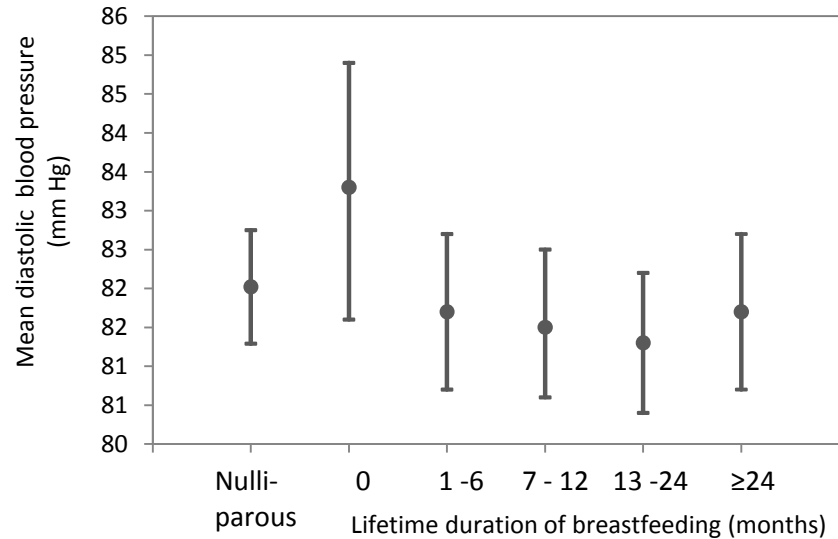

Supplement: MOESM1 [file 9628098]
